# Supplementary material
Source: publisher figshare collection journal article supplement (https://frontiersin.figshare.com/ndownloader/files/34871334)
Supplement: Supplementary file 1 [file 34871334]

***Supplementary Material***

# Supplementary Figures

#
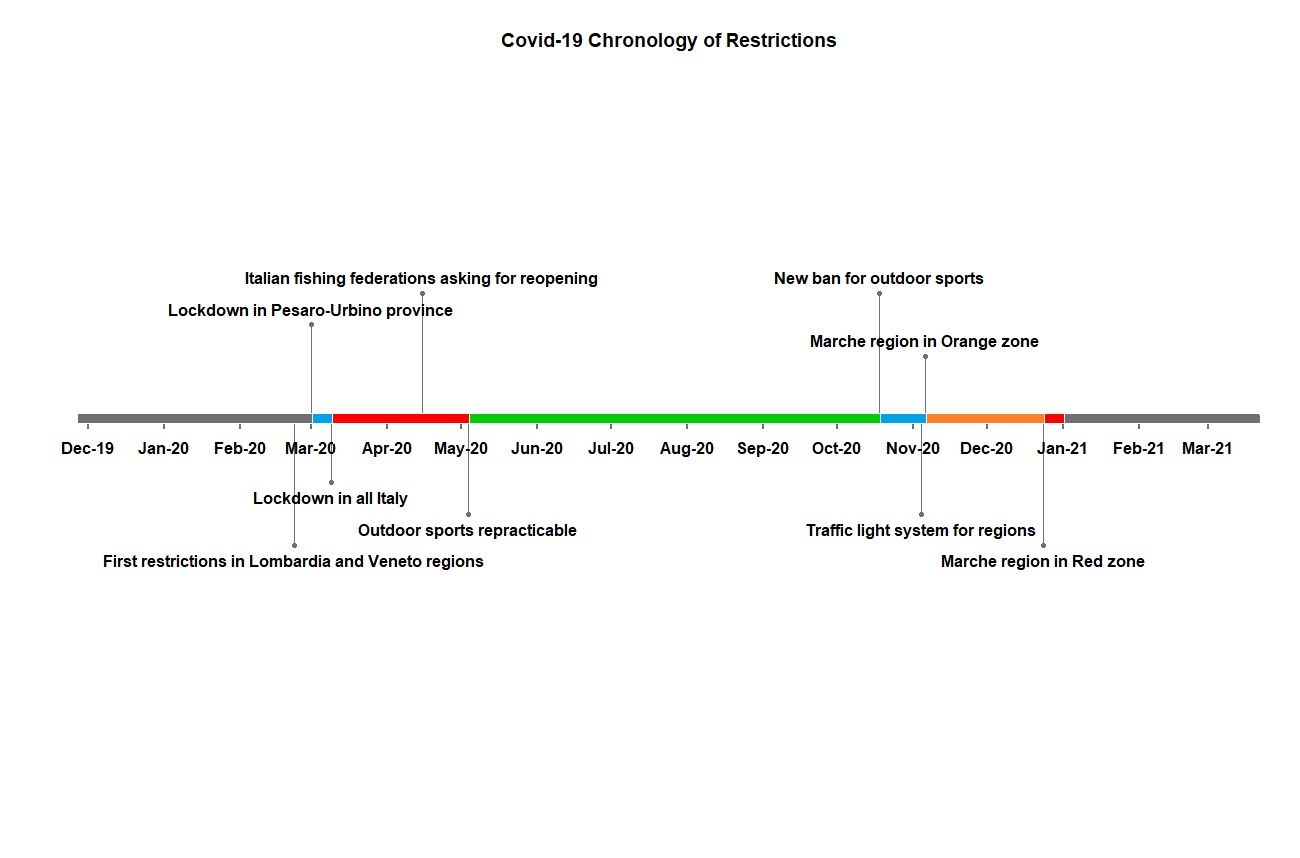
Supplementary Figure 1. Covid-19 chronology of restrictions.

## Supplementary Tables

**Supplementary Table I.** Chronology of restrictions due to Covid-19 pandemic.

| 2020 | February 23rd | First restrictions in Lombardy and Veneto regions (lockdown in some cities). |
| --- | --- | --- |
| March 1st | Lockdown extended in Marche region to the province of Pesaro-Urbino. |
| March 9th | Lockdown declared for the whole Italy. |
| April | First requests for attention from the Italian fishing federations (FIPSAS and FIOPS). Formal letter sent to the president of the Council of Ministers for the resumption of RF. Different petitions were also launched. |
| May 4th | Outdoor sports officially re-practicable. |
| October 18th | New ban for outdoor sports (only for amateurs). |
| November 4th | Establishment of the “traffic light” system for the regions. The restrictions on RF activities, from now on, are subject to the category of the region. |
| November 6th | Marche region declared in Orange zone. |
| December 24th-27th and 31st | Red zone along the whole Italy. |

**Supplementary Table II.** “Traffic light” approach effects description on MRF.

|  | WHITE ZONE: MRF freely exercisable throughout the region. |
| --- | --- |
|  | YELLOW ZONE: MRF freely exercisable, with the sole limitation NOT to leave the regional borders and to respect the curfew time which remains confirmed from 22:00 to 5:00. Self-certification is not required for travel. |
|  | ORANGE ZONE: MRF allowed within the municipality of residence. In addition, residents in municipalities of less than 5000 inhabitants can also move up to 30 km from the municipal boundaries (without however going to the capitals) to go fishing. (*2) |
|  | RED ZONE: it is allowed to carry out sporting activities exclusively within the municipality of residence, from 5.00 to 22.00, individually, maintaining an interpersonal distance of two meters. It is not allowed to move to start fishing in a territory other than that of the Municipality of residence. |

**Supplementary Table III.** Information collected through on-site survey (referred at the single fishing day) and recall survey (referred at the previous month).

| Personal data | Age, gender, possible presence of other fishers |
| --- | --- |
| Fishing effort | Preferred fishing modality, fishing hours |
| Catches | Total catch and release quantity |
| Economic data | Expenditures for equipment, natural or artificial bait, fuel, etc. |
| Panel | Willingness to be recontacted |

**Supplementary Table IV. C**onfidence intervals extremes of the two distributions and the p-value obtained by applying the second bootstrap algorithm.

| **Distribution** | **Inf CI** | **Sup CI** |
| --- | --- | --- |
| Panelists | 14.11 | 28.42 |
| GSA 17 sample | 17.18 | 20.83 |
|  | | |
| p-value | 0.92 | |
